# Supplementary material for: CrdS and CrdA Comprise a Two-Component System That Is Cooperatively Regulated by the Che3 Chemosensory System in Myxococcus xanthus
Source: PubMed Central journal article supplement — mBio. 2011 Aug 2;2(4):e00110-11. doi: 10.1128/mBio.00110-11 (PMC3147164; doi:10.1128/mbio.00110-11), 2011-08-02
Supplement: mbo004111144st1.pdf [file mbo004111144st1.pdf]

| Strain | Genotype                                                | Reference  |
|--------|---------------------------------------------------------|------------|
| DZ2    | Wild-type <i>Myxococcus xanthus</i>                     | (2)        |
| DZ4507 | DZ2 <i>cheA3</i>                                        | (2)        |
| DZ4513 | DZ2 <i>crdA</i>                                         | (2)        |
| JK1856 | DZ2 <i>crdS</i>                                         | (2)        |
| JK1857 | DZ2 Mx8:: <i>PpilA-crdS</i>                             | This Study |
| JK1858 | DZ2 <i>crdA</i> Mx8:: <i>PpilA-crdS</i>                 | This Study |
| JK1859 | DZ2 <i>cheA3</i> Mx8:: <i>PpilA-crdS</i>                | This Study |
| JK1860 | DZ2 <i>crdA crdS</i>                                    | This Study |
| JK1861 | DZ2 <i>crdS</i> Mx8:: <i>PpilA-crdS</i>                 | This Study |
| pBJ114 | DH5a pBJ114                                             | (38)       |
| JK1862 | BL21(DE3) pET28:: <i>CrdSsoluble</i>                    | This Study |
| JK1863 | BL21(DE3) pET28:: <i>CrdS(H371A)soluble</i>             | This Study |
| JK1864 | BL21(DE3) pET28:: <i>CrdA</i>                           | This Study |
| JK1865 | BL21(DE3) pET28:: <i>CrdA(D53A)</i>                     | This Study |
| JK1866 | BL21(DE3) pET28:: <i>CrdA(D53E)</i>                     | This Study |
| JK1867 | BL21(DE3) pET28:: <i>NtrC_1189</i>                      | This Study |
| JK1868 | BL21(DE3) pET28:: <i>HK_1190</i>                        | This Study |
| JK1869 | BL21(DE3) pET28:: <i>NtrC_4261</i>                      | This Study |
| JK1870 | BL21(DE3) pET28:: <i>HK_4262</i>                        | This Study |
| JK1871 | Rosetta pQE80-CheA3                                     | This Study |
| JK1872 | Rosetta pET28-DifE                                      | This Study |
| JK1880 | DZ2 <i>cheA3crdA</i>                                    | This Study |
| JK1881 | DZ2 <i>cheA3crdS</i>                                    | This Study |
| JK1882 | DZ2 <i>crdA</i> Mx8:: <i>PpilA-crdA</i>                 | This Study |
| JK1883 | DZ2 <i>crdA</i> Mx8:: <i>PpilA-crdA</i> <sub>D53E</sub> | This Study |
| JK1884 | DZ2 <i>crdA</i> Mx8:: <i>PpilA-crdA</i> <sub>D53A</sub> | This Study |
| JK1885 | DZ2 Mx8:: <i>PpilA-cheA3</i>                            | This Study |
| JK1886 | DZ2 Mx8:: <i>PpilA-crdA</i>                             | This Study |
