# Supplementary figures and images for: CrdS and CrdA Comprise a Two-Component System That Is Cooperatively Regulated by the Che3 Chemosensory System in Myxococcus xanthus
Source: PubMed Central journal article supplement — mBio. 2011 Aug 2;2(4):e00110-11. doi: 10.1128/mBio.00110-11 (PMC3147164; doi:10.1128/mbio.00110-11), 2011-08-02

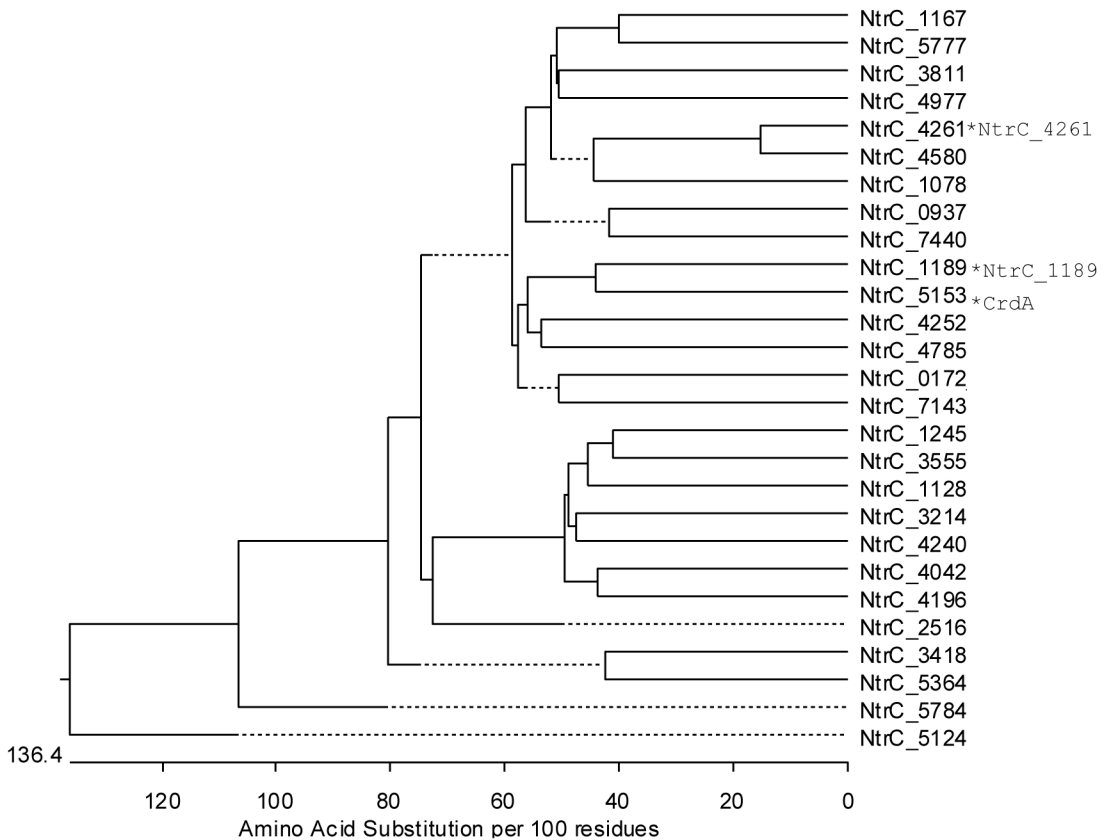

Supplement: mbo004111144sf01.pdf [file mbo004111144sf01.pdf]

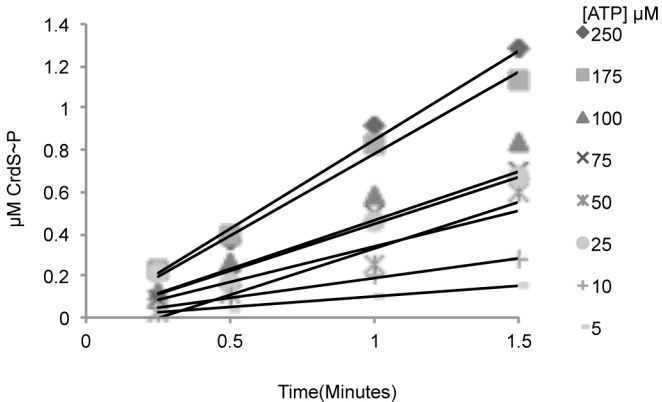

Supplement: mbo004111144sf02.pdf [file mbo004111144sf02.pdf]

**A**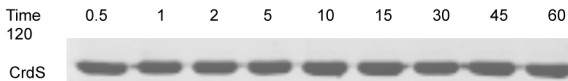**B**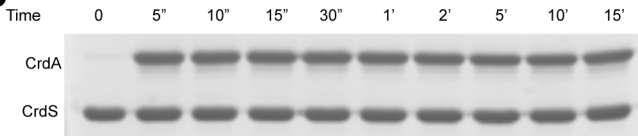**C**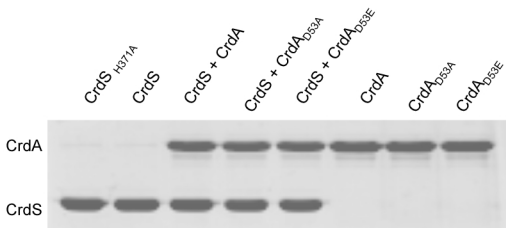**D**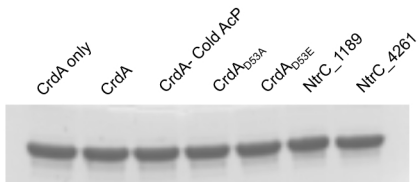

Supplement: mbo004111144sf03.pdf [file mbo004111144sf03.pdf]

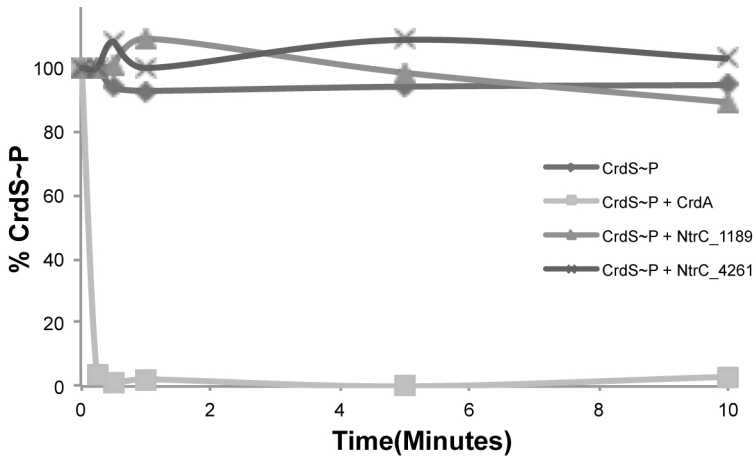

Supplement: mbo004111144sf04.pdf [file mbo004111144sf04.pdf]

# A

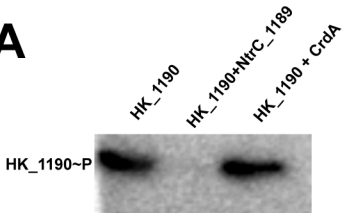

# B

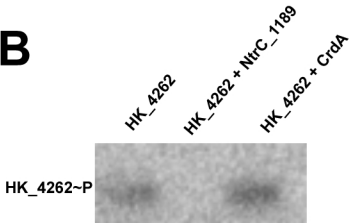

Supplement: mbo004111144sf05.pdf [file mbo004111144sf05.pdf]
